# Supplementary material for: Hierarchical core–shell structural NiMoO4@NiS2/MoS2 nanowires fabricated via an in situ sulfurization method for high performance asymmetric supercapacitors
Source: Royal Society of Chemistry journal article supplement (doi:10.1039/c9ta07731f), 2019-01-01
Supplement: c9ta07731f1.pdf [file c9ta07731f1.pdf]

**Hierarchical core-shell structural NiMoO<sub>4</sub>@NiS<sub>2</sub>/MoS<sub>2</sub>  
nanowires fabricated via in-situ sulfurization method for  
high performance asymmetric supercapacitor**

Duo Chen,<sup>a†</sup> Mengjie Lu,<sup>a†</sup> La Li,<sup>\*a</sup> Dong Cai,<sup>a</sup> Junzhi Li,<sup>a</sup> Junming Cao<sup>a</sup> and Wei Han<sup>\*a,b</sup>

<sup>a</sup> Sino-Russian International Joint Laboratory for Clean Energy and Energy Conversion

Technology, College of Physics, Jilin University, Changchun 130012, P. R. China. E-mail:

lali910217@gmail.com; whan@jlu.edu.cn

<sup>b</sup> International Center of Future Science, Jilin University, Changchun City 130012, PR China.

† These authors contributed equally to this work.

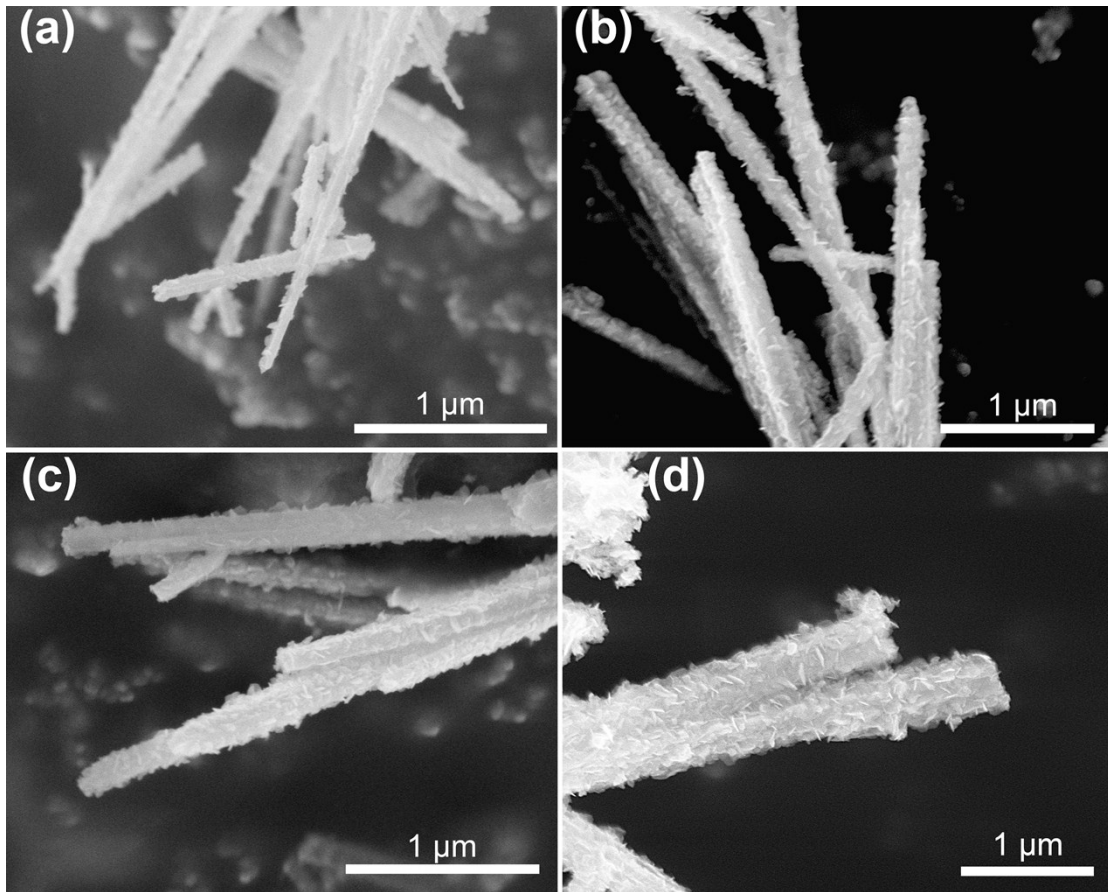

Fig. S1 The morphology evolution of as-obtained samples as sulfur mass increasing in the preparation process: (a) S-NiMoO<sub>4</sub>-1; (b) S-NiMoO<sub>4</sub>-2; (c) S-NiMoO<sub>4</sub>-3; (d) NiS<sub>2</sub>/MoS<sub>2</sub>.

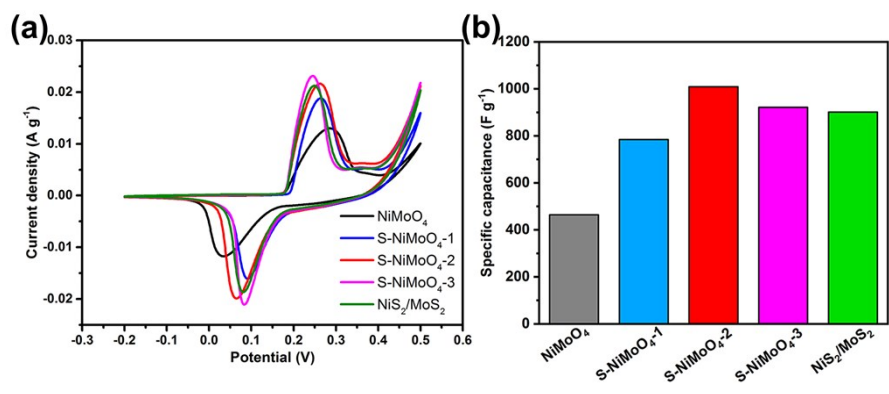

Fig. S2 (a) CV curves of different samples at a same scan rate of 5 mV s<sup>-1</sup> and (b) calculated specific capacitance at this scan rate corresponding to (a).

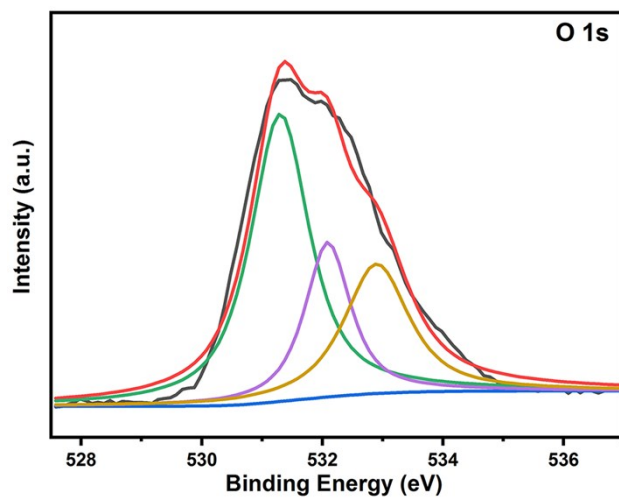

Fig. S3 High resolution XPS spectrum of O 1s in S-NiMoO<sub>4</sub>-2 nanowires.

Table S1 The detailed data of various samples obtained by GCD profiles

| Samples                                | Specific capacitance obtained by GCD profiles (F g <sup>-1</sup> ) |                       |                      |                      |                      |
|----------------------------------------|--------------------------------------------------------------------|-----------------------|----------------------|----------------------|----------------------|
|                                        | 5 A g <sup>-1</sup>                                                | 7.5 A g <sup>-1</sup> | 10 A g <sup>-1</sup> | 15 A g <sup>-1</sup> | 20 A g <sup>-1</sup> |
| <b>NiMoO<sub>4</sub></b>               | 407                                                                | 363                   | 329                  | 267                  | 213                  |
| <b>S-NiMoO<sub>4</sub>-1</b>           | 707                                                                | 633                   | 591                  | 473                  | 409                  |
| <b>S-NiMoO<sub>4</sub>-2</b>           | 970                                                                | 897                   | 844                  | 780                  | 711                  |
| <b>S-NiMoO<sub>4</sub>-3</b>           | 833                                                                | 773                   | 733                  | 673                  | 631                  |
| <b>NiS<sub>2</sub>/MoS<sub>2</sub></b> | 761                                                                | 682                   | 607                  | 533                  | 476                  |

Table S2 The specific capacities of various samples

| Samples                                | Specific capacities (C g <sup>-1</sup> ) |                       |                      |                      |                      |
|----------------------------------------|------------------------------------------|-----------------------|----------------------|----------------------|----------------------|
|                                        | 5 A g <sup>-1</sup>                      | 7.5 A g <sup>-1</sup> | 10 A g <sup>-1</sup> | 15 A g <sup>-1</sup> | 20 A g <sup>-1</sup> |
| <b>NiMoO<sub>4</sub></b>               | 183                                      | 163                   | 148                  | 120                  | 96                   |
| <b>S-NiMoO<sub>4</sub>-1</b>           | 318                                      | 285                   | 266                  | 213                  | 184                  |
| <b>S-NiMoO<sub>4</sub>-2</b>           | 437                                      | 404                   | 380                  | 351                  | 320                  |
| <b>S-NiMoO<sub>4</sub>-3</b>           | 375                                      | 348                   | 330                  | 303                  | 284                  |
| <b>NiS<sub>2</sub>/MoS<sub>2</sub></b> | 343                                      | 307                   | 273                  | 240                  | 214                  |

Table S3 The detailed data of various samples obtained by CV curves

| Samples                                | Specific capacitance obtained by CV curves (F g <sup>-1</sup> ) |                          |                          |                          |                          |                          |
|----------------------------------------|-----------------------------------------------------------------|--------------------------|--------------------------|--------------------------|--------------------------|--------------------------|
|                                        | 5<br>mV s <sup>-1</sup>                                         | 10<br>mV s <sup>-1</sup> | 15<br>mV s <sup>-1</sup> | 20<br>mV s <sup>-1</sup> | 30<br>mV s <sup>-1</sup> | 50<br>mV s <sup>-1</sup> |
| <b>NiMoO<sub>4</sub></b>               | 464                                                             | 398                      | 380                      | 363                      | 331                      | 267                      |
| <b>S-NiMoO<sub>4</sub>-1</b>           | 784                                                             | 627                      | 573                      | 538                      | 497                      | 436                      |
| <b>S-NiMoO<sub>4</sub>-2</b>           | 1010                                                            | 805                      | 742                      | 704                      | 654                      | 579                      |
| <b>S-NiMoO<sub>4</sub>-3</b>           | 921                                                             | 727                      | 660                      | 622                      | 578                      | 523                      |
| <b>NiS<sub>2</sub>/MoS<sub>2</sub></b> | 901                                                             | 660                      | 586                      | 543                      | 492                      | 427                      |

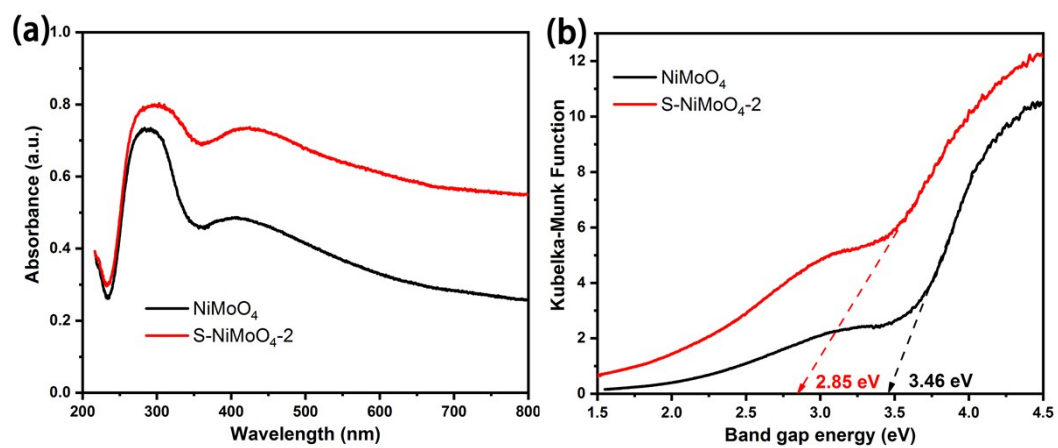

Fig. S4 (a) UV-Vis diffuse reflectance spectra and (b) Kubelka-Munk plot for estimating bandgap energy of  $\text{NiMoO}_4$  and  $\text{S-NiMoO}_4\text{-2}$ .

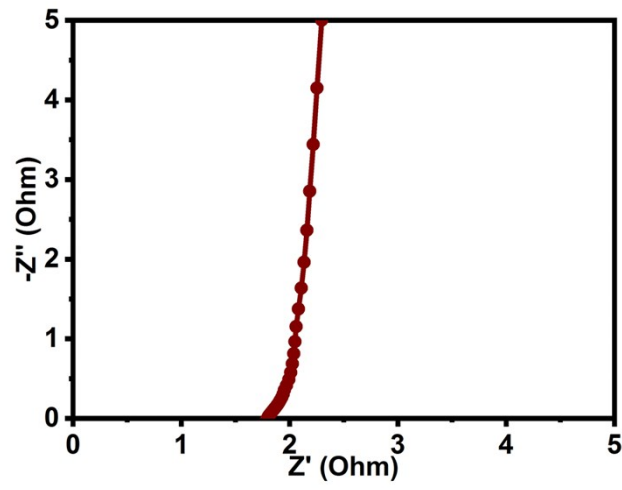

Fig. S5 Electrochemical impedance spectrum of the S-NiMoO<sub>4</sub>-2 based ASC.

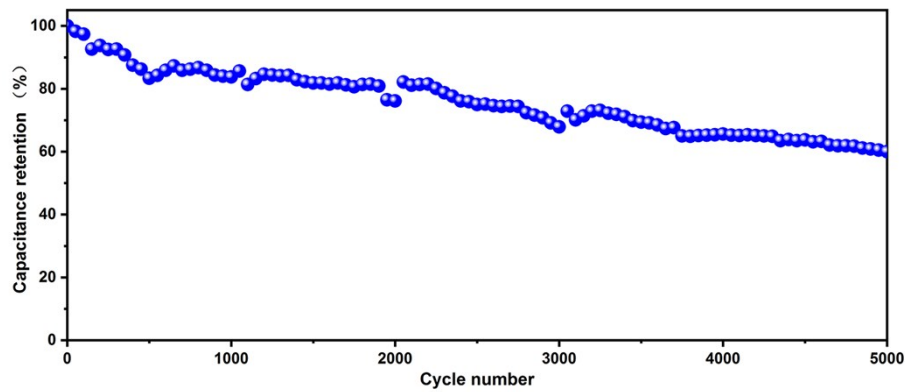

Fig. S6 Cycling stability of the S-NiMoO<sub>4</sub>-2 based ASC at a fixed current density of 2 A g<sup>-1</sup>.



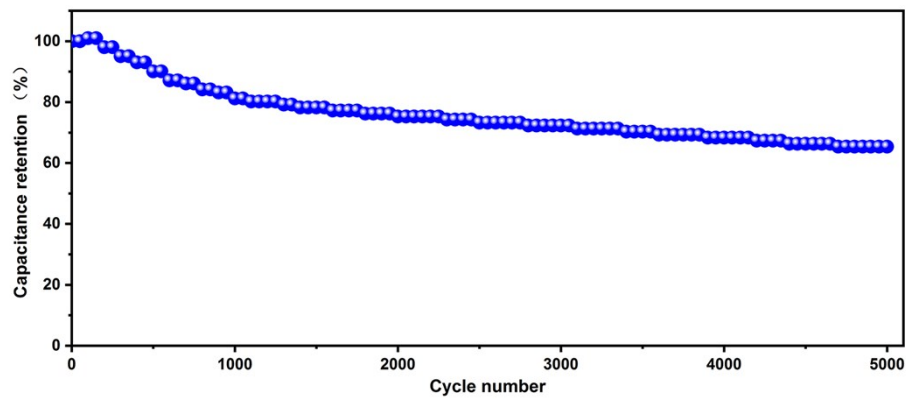

Fig. S7 Cycling stability of S-NiMoO<sub>4</sub>-2 electrode in a 3-electrode system at a current density of 15 A g<sup>-1</sup>. The S-NiMoO<sub>4</sub>-2 electrode can deliver more than 65.3% capacitance after 5000 cycles.

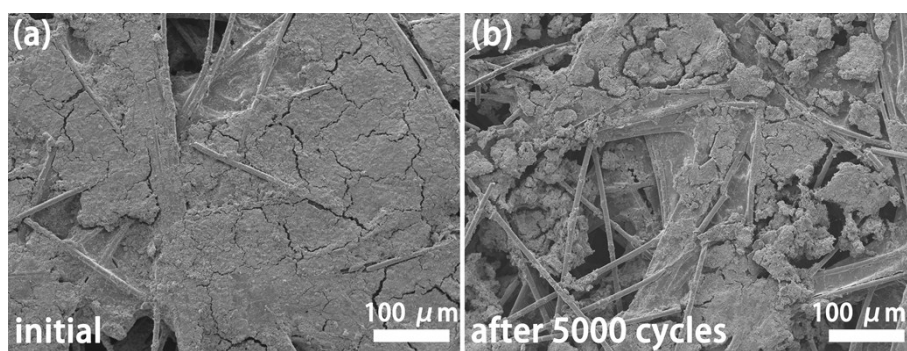

Fig. S8 SEM images of (a) the initial S-NiMoO<sub>4</sub>-2 electrode and (b) the electrode after 5000 cycles in 6 M KOH. The fiber-shape matters are carbon fiber of the carbon paper substrate.
